# Supplementary material for: Physically cross-linked polyethyleneviareactive extrusion
Source: Royal Society of Chemistry journal article supplement (doi:10.1039/c9py00168a), 2019-01-01
Supplement: c9py00168a1.pdf [file c9py00168a1.pdf]

## Electronic supplementary information for

### Physically cross-linked polyethylene via reactive extrusion

*Arkadiusz Zych, Alice Verdelli, Maria Solimant, Roberta Pinalli, Jerome Vachon and Enrico Dalcanale*

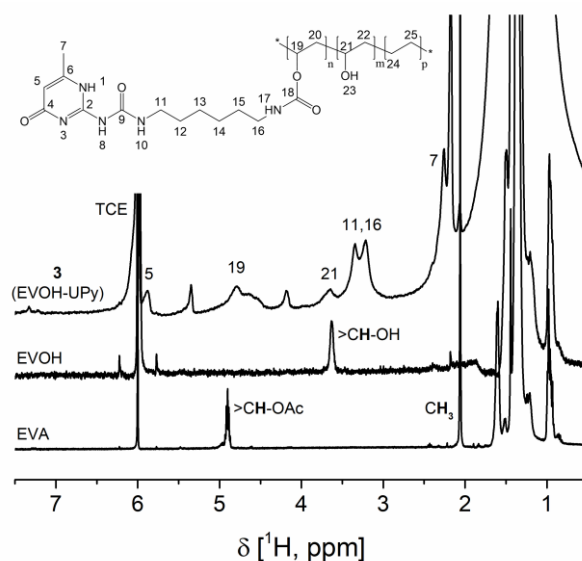

Figure S1.  $^1\text{H}$  NMR spectra overlay of EVA, EVOH and polymer **3** (EVOH-UPy) recorded at 120 °C in deuterated TCE.

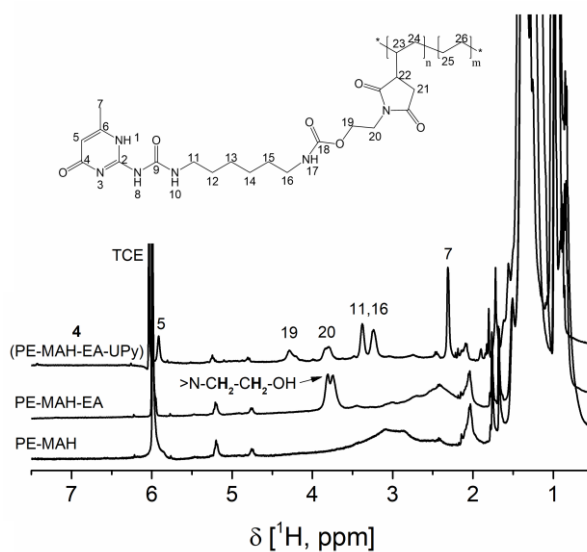

Figure S2.  $^1\text{H}$  NMR spectra overlay of PE-MAH, PE-MAH-EA and polymer **4** (PE-MAH-EA-UPy) recorded at 120 °C in deuterated TCE.

Table S1. Functional group content, melting temperatures ( $T_m$ ),  $\beta$  transition temperatures ( $T_\beta$ ) degrees of crystallinity ( $X_{cr}$ ) as well as molecular weights ( $M_n$ ,  $M_w$ ) and molecular weight distributions ( $\mathcal{D}_M$ ) of the starting polyolefins.

| Polymer | Functional group content [mol%] <sup>a</sup> | $T_m^b$ [°C] | $T_\beta^c$ [°C]                       | $X_{cr}^d$ [%] | $M_n^e$ [g/mol] | $M_w^e$ [g/mol] | $\mathcal{D}_M^e$ |
|---------|----------------------------------------------|--------------|----------------------------------------|----------------|-----------------|-----------------|-------------------|
| EVA     | 3.0                                          | 99.1         | -9.5 <sup>f</sup><br>59.8 <sup>f</sup> | 11.7           | 13 500          | 69 100          | 5.1               |
| PE-MAH  | 0.4                                          | 99.2         | -16.4                                  | 9.3            | 2 500           | 5 900           | 2.4               |

<sup>a</sup> Functional group content was calculated from <sup>1</sup>H-NMR (400 MHz, 120 °C, TCE *d*<sub>2</sub>); PE-MAH with higher functional group content is not commercially available. <sup>b</sup> Melting temperatures ( $T_m$ ) were determined by DSC from the second heating scan. <sup>c</sup>  $\beta$  transition temperatures ( $T_\beta$ ) were determined by DMTA from the maximum of  $\tan \delta$ . <sup>d</sup> Degrees of crystallinity ( $X_{cr}$ ) were calculated dividing the melting enthalpy of 100% crystalline PE (286.2 J/g, B. Wunderlich, C. M. Cormier, Heat of fusion of polyethylene. *Journal of Polymer Science Part A-2: Polymer Physics* **1967**, 5 (5), 987-988.) by melting enthalpy of a polymer determined by DSC from the second heating scan. <sup>e</sup> Molecular weight and polydispersity were determined by SEC in *o*DCB at 150 °C with respect to polyethylene standards. <sup>f</sup> two  $\beta$  transition temperatures were observed.

### Calculation of UPy units per chain

Number of UPy/chain was calculated based on the amount of -OH grafted and  $M_n$  of starting material according to the Equation S1. Functional group content, hydrogen bonding motif content and  $M_n$  of the functionalized PE can be found in the Table 1 and Table 2. Repeating unit other than ethylene is treated as a “comonomer” for this calculation even though the polymer might not have been obtained by copolymerization of this fragment with ethylene.

$$UPy / chain = \frac{M_n \left[ \frac{g}{mol} \right] \cdot hydrogen\ bonding\ motif\ [mol\%]}{functional\ group\ [mol\%] \cdot M_{comonomer} \left[ \frac{g}{mol} \right] + (100 - functional\ group\ [mol\%]) \cdot M_{ethylene} \left[ \frac{g}{mol} \right]} \quad (1)$$

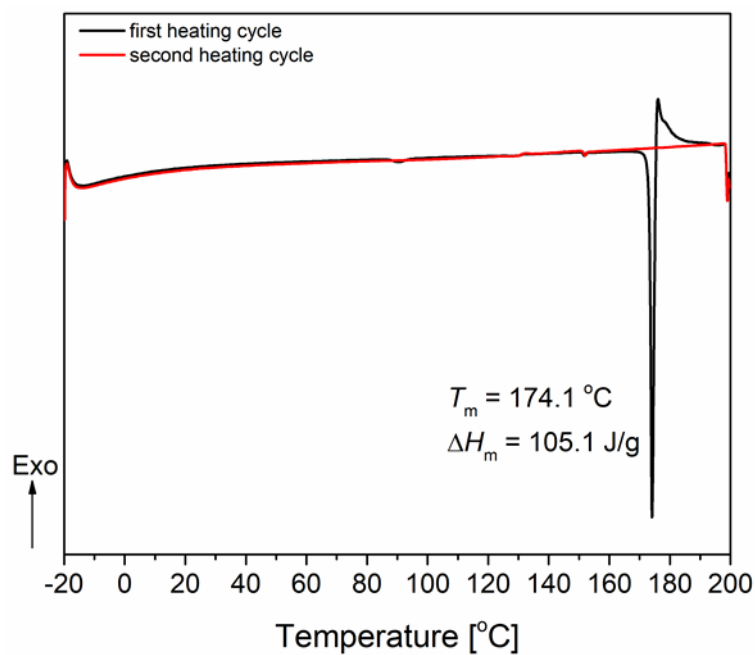

Figure S3. DSC first (black) and second (red) heating curve of UPy.

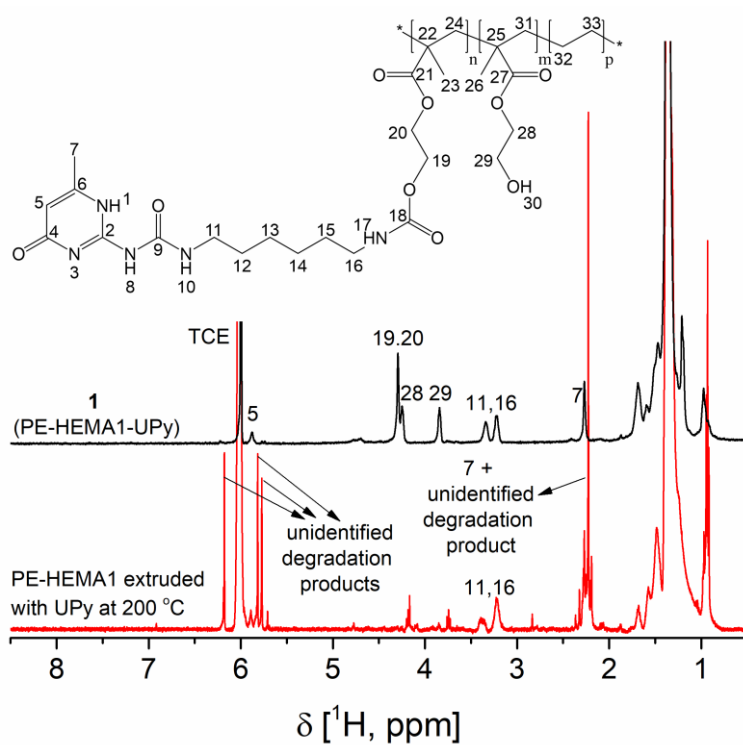

Figure S4.  $^1\text{H}$  NMR spectra overlay of polymer **1** (PE-HEMA1-UPy, black) and PE-HEMA1 extruded with UPy at 200  $^\circ\text{C}$  (red), recorded at 120  $^\circ\text{C}$  in deuterated TCE.

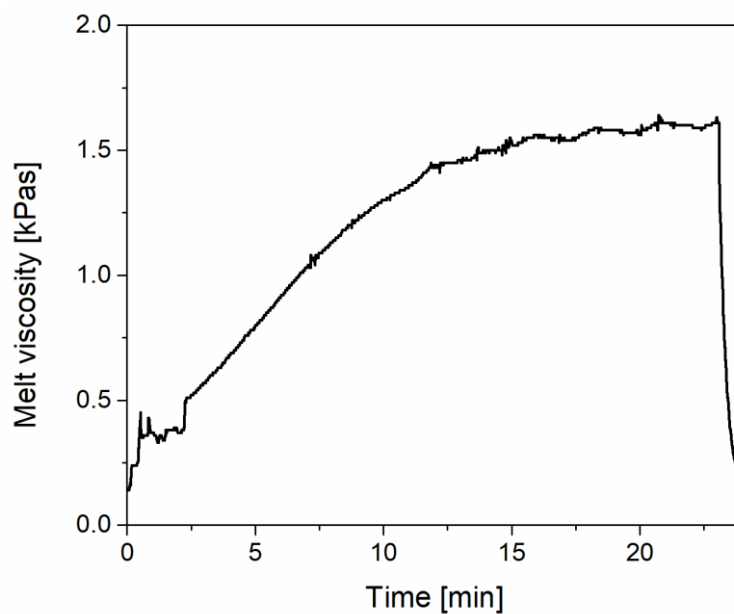

Figure S5. Representative melt viscosity changes recorded during the reactive extrusion of polymer 2 (PE-HEMA2-IPR-UPy)

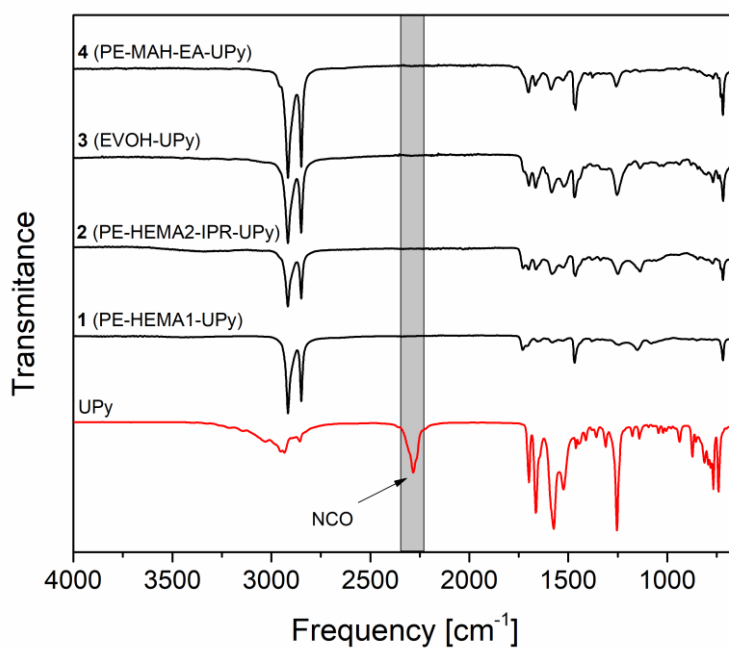

Figure S6. IR spectra overlay of UPy (red line) and functional polyolefins grafted with UPy or IPR-UPy (black lines).

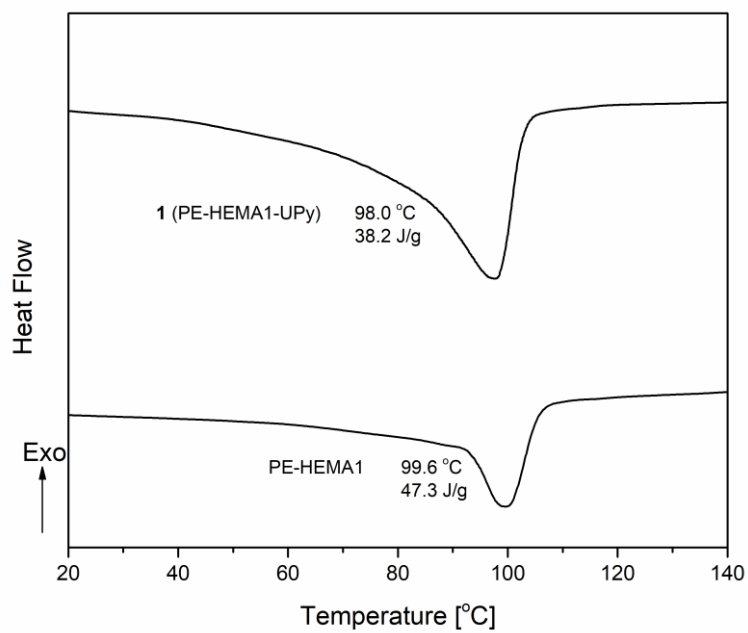

Figure S7. DSC second heating curves of PE-HEMA1 and polymer **1** (PE-HEMA2-UPy).

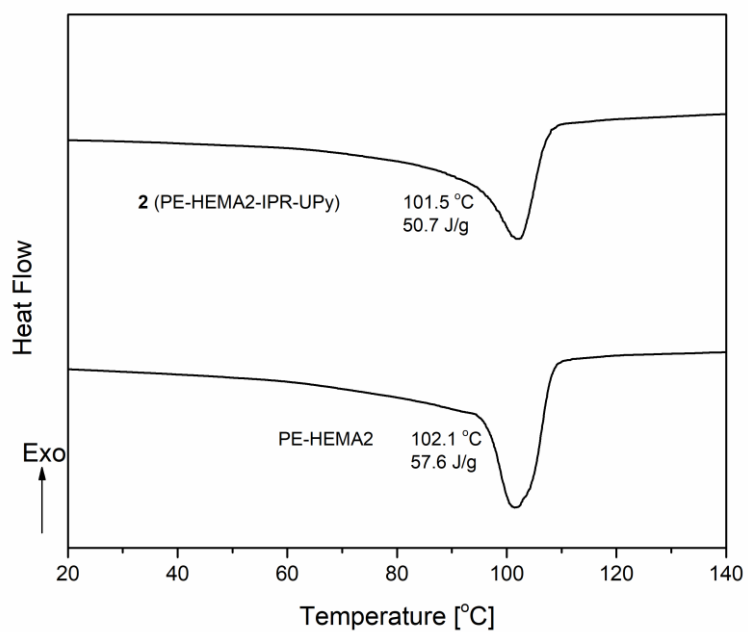

Figure S8. DSC second heating curves of PE-HEMA2, and polymer **2** (PE-HEMA2-IPR-UPy).

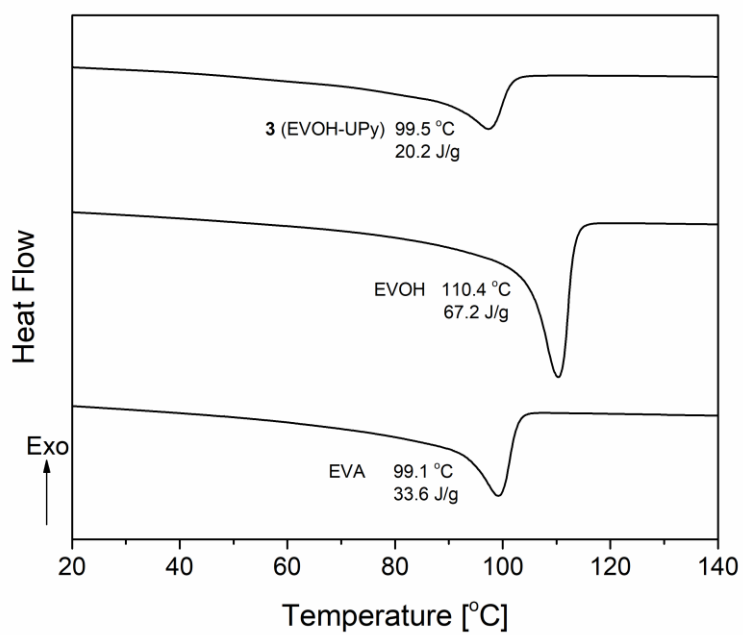

Figure S9. DSC second heating curves of EVA, EVOH and polymer 3 (EVOH-UPy).

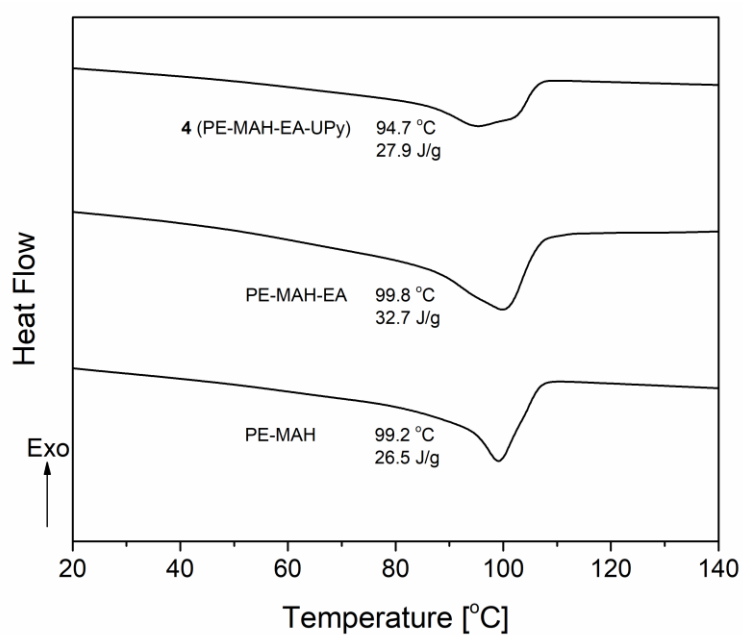

Figure S10. DSC second heating curves of PE-MAH, PE-MAH-EA and polymer 4 (PE-MAH-EA-UPy).

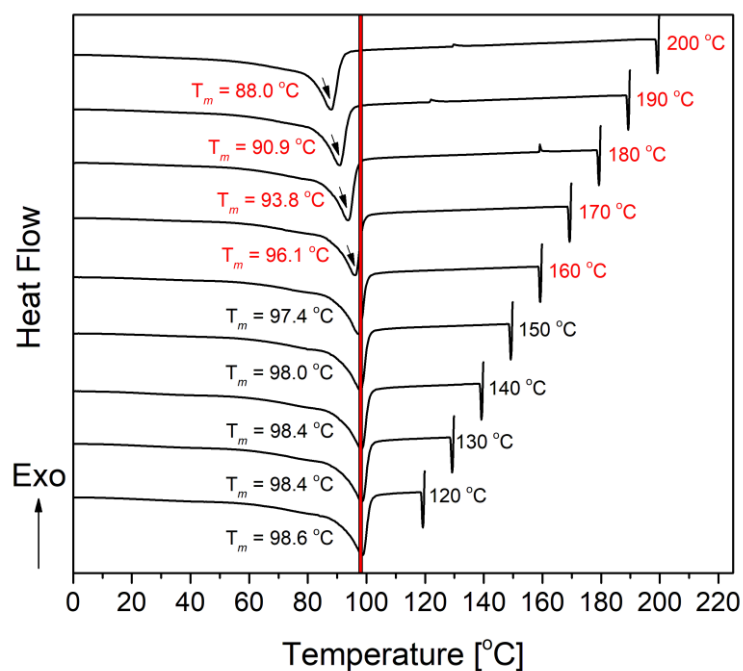

Figure S11. DSC heating curves of polymer **3** (EVOH-UPy), maximal temperature was increased by 10 °C each time starting from 120 °C.

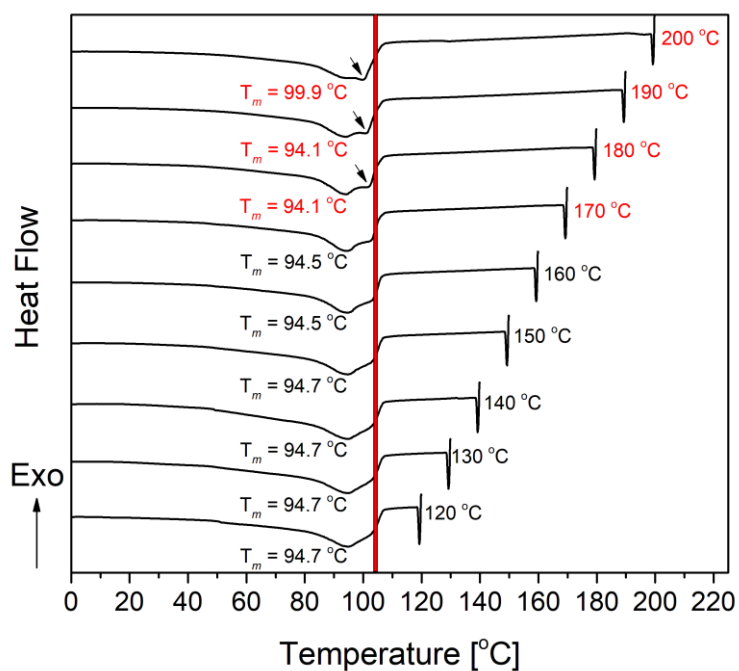

Figure S12. DSC heating curves of polymer **4** (PE-MAH-EA-UPy) maximal temperature was increased by 10 °C each time starting from 120 °C.

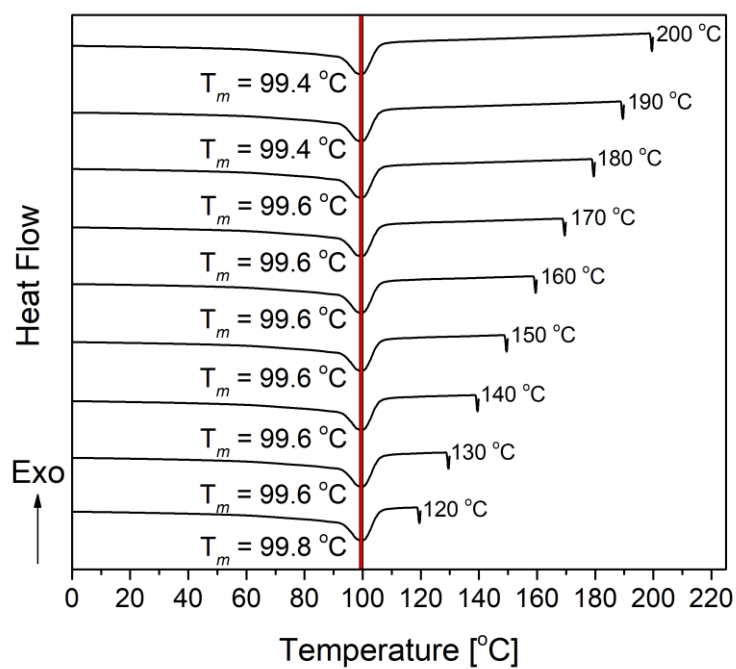

Figure S13. DSC heating curves of PE-HEMA1, maximal temperature was increased by 10 °C each time starting from 120 °C.

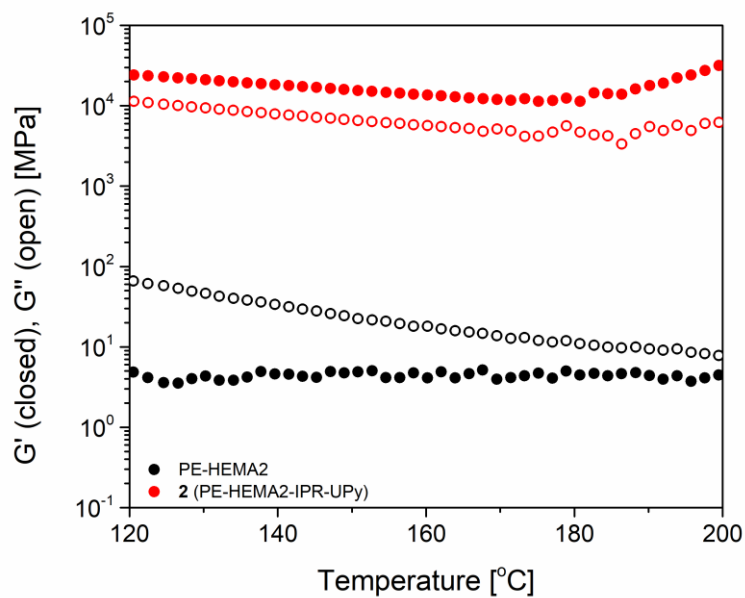

Figure S14. Rheology temperature sweep curves of PE-HEMA2 and polymer **2** (PE-HEMA1-UPy).



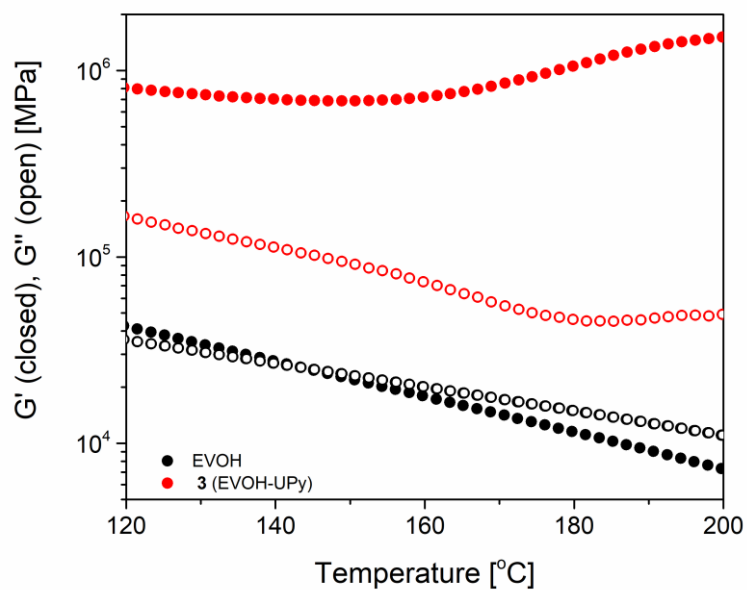

Figure S15. Rheology temperature sweep curves of EVOH and polymer **3** (EVOH-UPy).

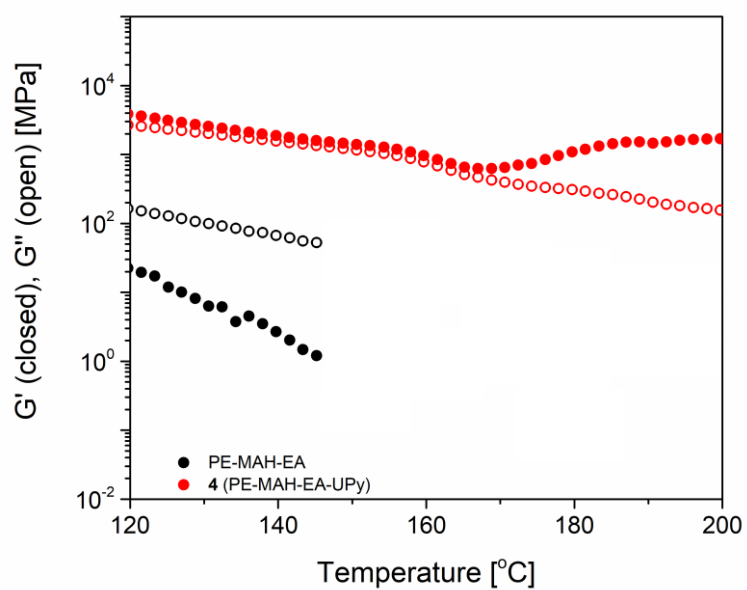

Figure S16. Rheology temperature sweep curves of PE-MAH-EA and polymer **4** (PE-MAH-EA-UPy).

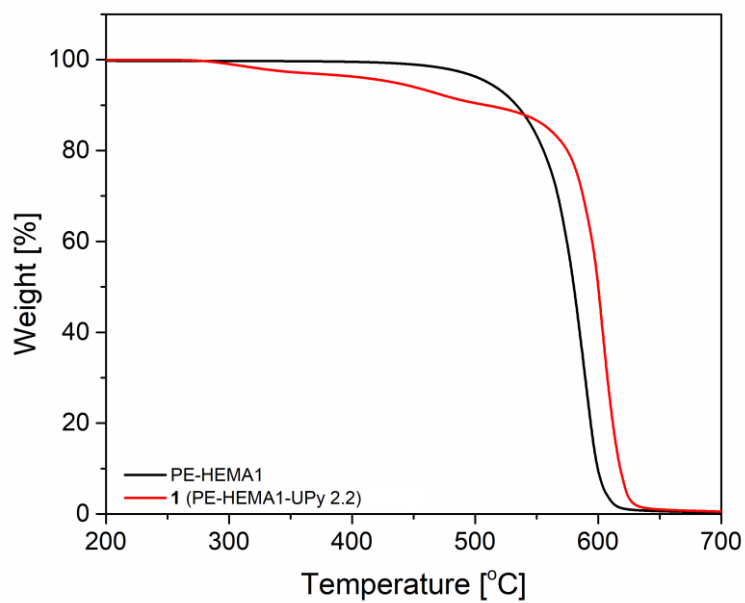

Figure S17. TGA curves of PE-HEMA1 and polymer **1** (PE-HEMA-UPy).

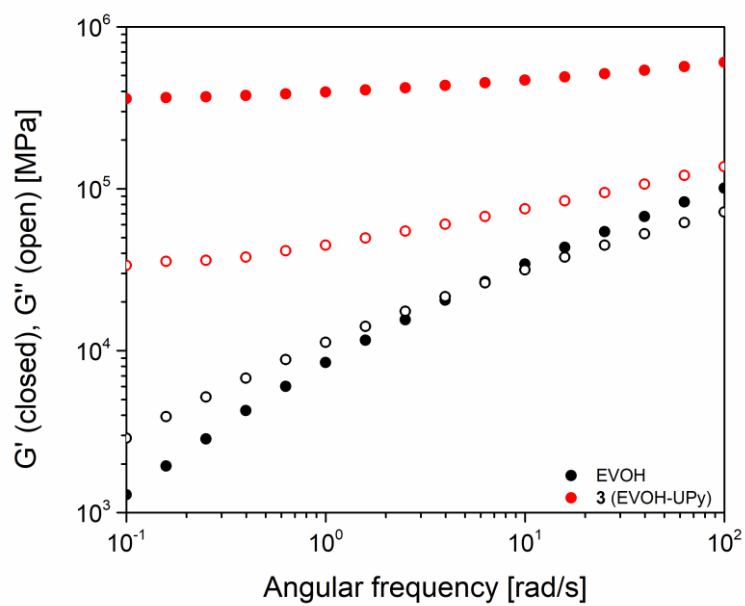

Figure S18. Rheology frequency sweep curves of EVOH and polymer **3** (EVOH-UPy).

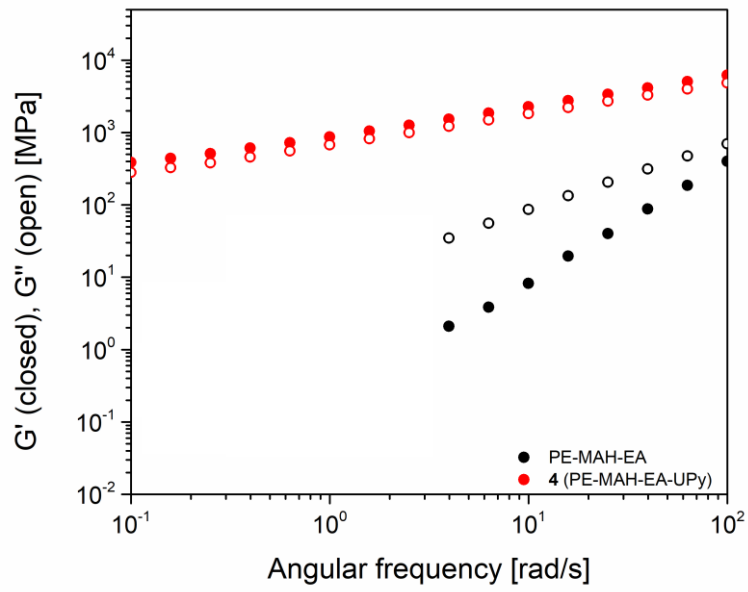

Figure S19. Rheology frequency sweep curves of PE-MAH-EA and polymer 4 (PE-MAH-EA-UPy)

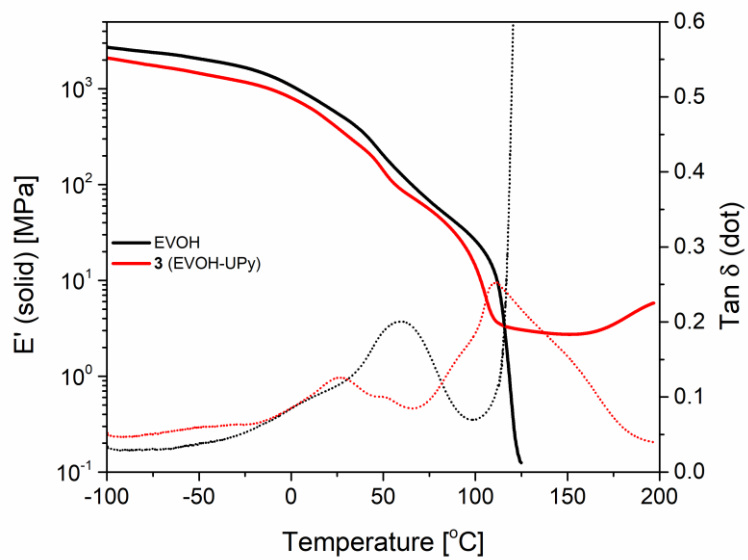

Figure S20. DMTA curves of EVOH and polymer 3 (EVOH-UPy).

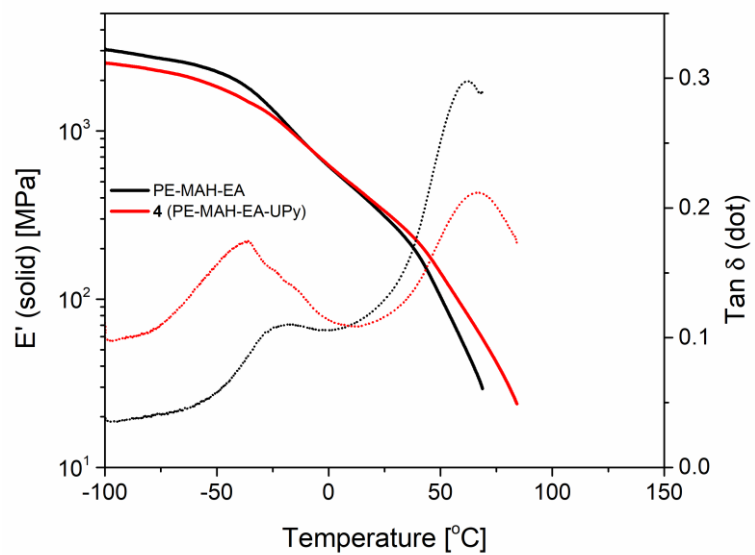

Figure S21. DMTA curves of PE-MAH-EA and polymer 4 (PE-MAH-EA-UPy)

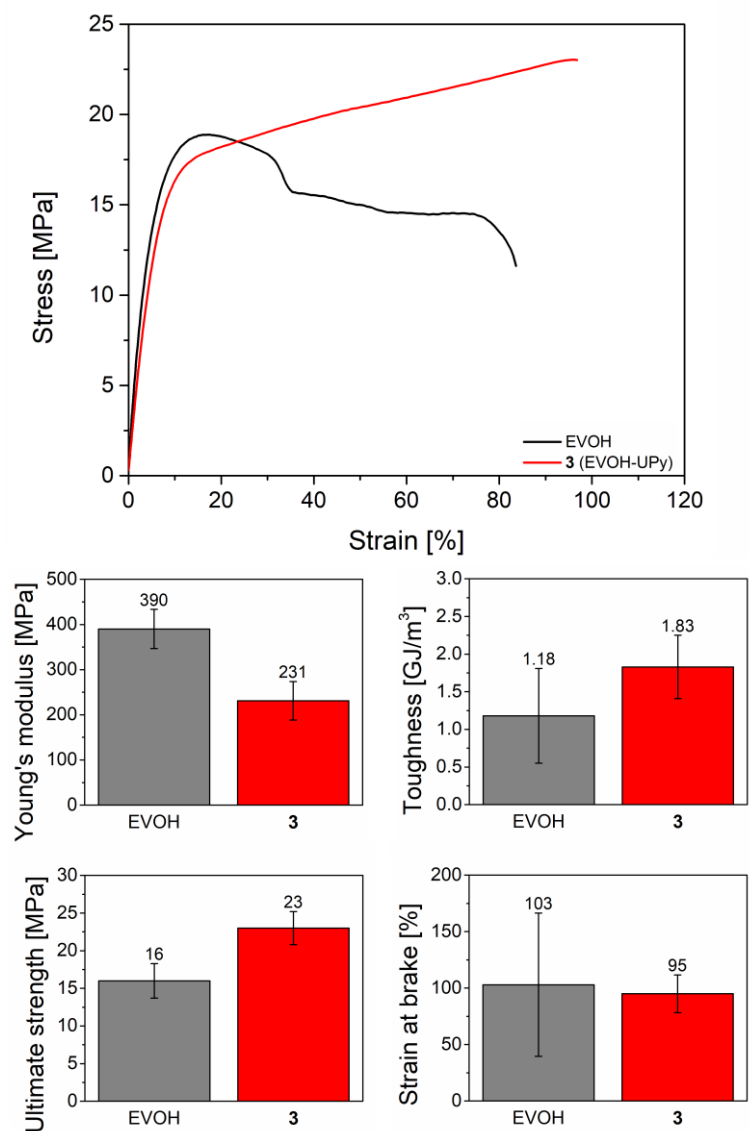

Figure S22. Representative stress-strain curves and Young's modulus, toughness, ultimate strength and strain at break of EVOH and polymer 3 (EVOH-UPy).

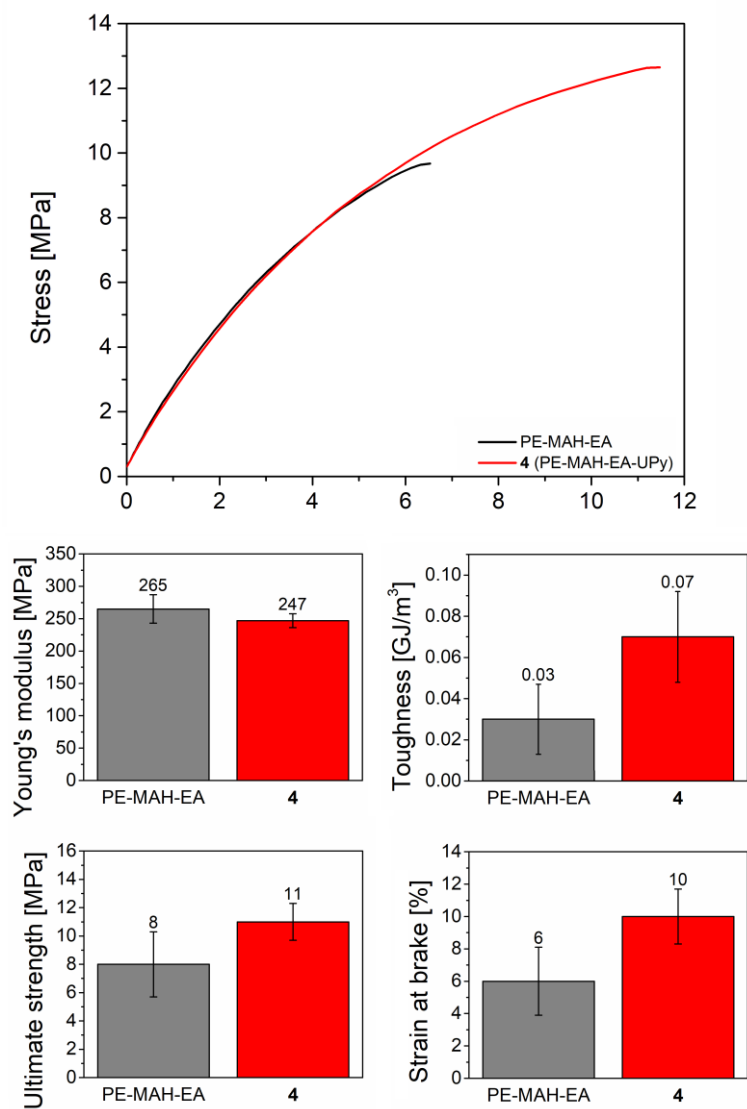

Figure S23. Representative stress-strain curves and Young's modulus, toughness, ultimate strength and strain at break of PE-MAH-EA and polymer 4 (PE-MAH-EA-UPy)
